# Supplementary material for: Chemically debondable, high-strength and tough adhesives from sulfur-modified epoxy networks
Source: Royal Society of Chemistry journal article supplement (doi:10.1039/d2gc04744f), 2023-01-01
Supplement: d2gc04744f1.pdf [file d2gc04744f1.pdf]

## Supporting Information

### **Chemically Debondable, High-strength and Tough Adhesives from Sulfur Modified Epoxy Networks**

Yu Jin, Zhengxiang Wang, Chengcheng Hu, Jie Wang, Kangle Yan, Juan He, Zhong Wang, Zhongkai Wang, Liang Yuan\*

Biomass Molecular Engineering Center, School of Forestry and Landscape Architecture, Anhui Agricultural University, Hefei, Anhui 230036, P. R. China

Email: [yuanliang2020@ahau.edu.cn](mailto:yuanliang2020@ahau.edu.cn)

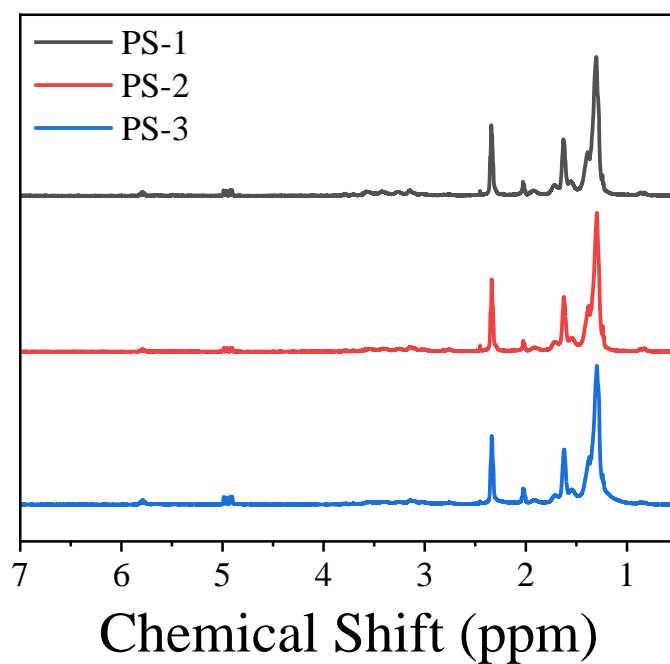

**Fig. S1.**  $^1\text{H}$  NMR spectrum of PS samples.

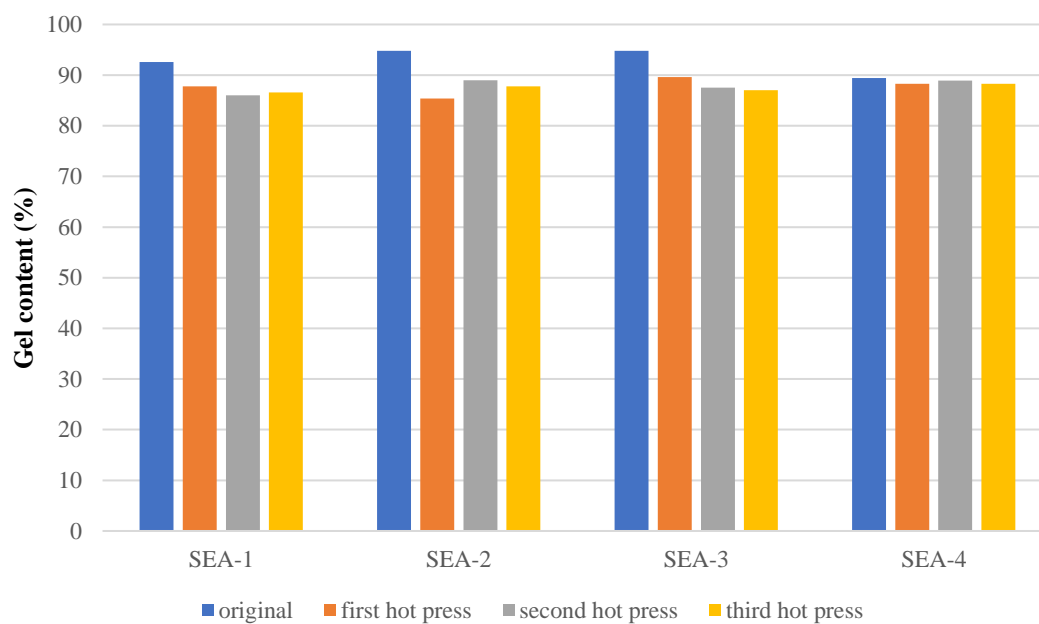

**Fig. S2.** Insoluble contents of SEA as-prepared samples and after each hot-pressing cycle.

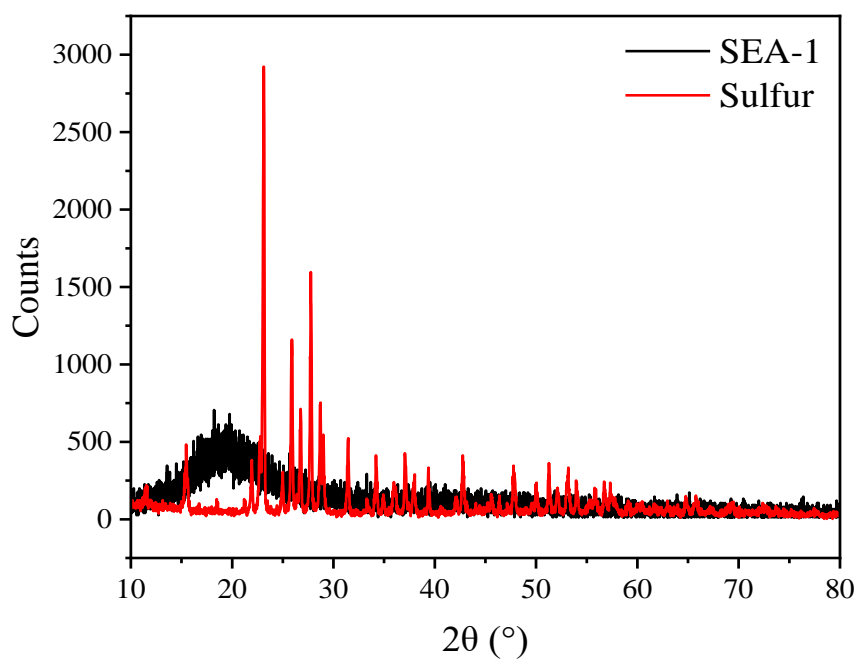

**Fig. S3.** XRD spectrum of sulfur and SEA-1.

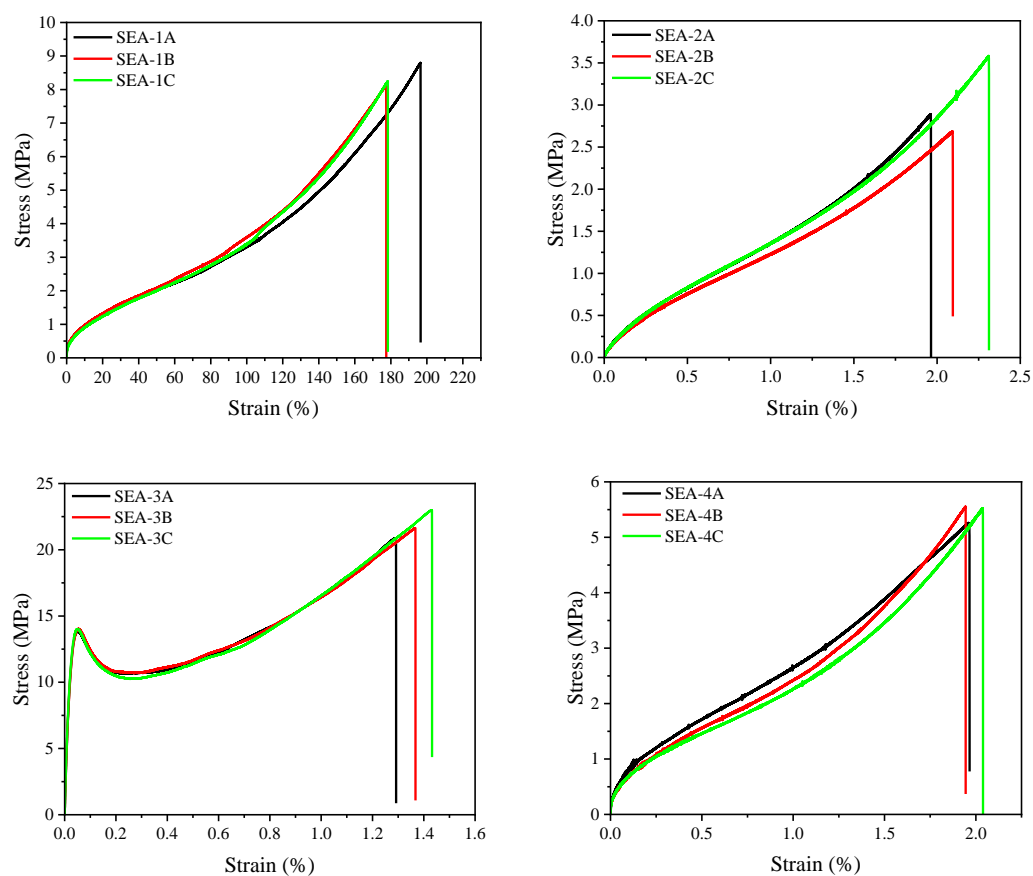

**Fig. S4.** Tensile testing results of SEA samples.

**Table S1.** Tensile test results of SEA samples.

| Sample | Strain at break A [%] | Strain at break B [%] | Strain at break C [%] | Mean value [%] | Standard deviation [%] | Stress at break A [MPa] | Stress at break B [MPa] | Stress at break C [MPa] | Mean value [MPa] | Standard deviation [MPa] |
|--------|-----------------------|-----------------------|-----------------------|----------------|------------------------|-------------------------|-------------------------|-------------------------|------------------|--------------------------|
| SEA-1  | 196.54                | 177.47                | 178.36                | 184.12         | 10.76                  | 8.79                    | 8.11                    | 8.24                    | 8.38             | 0.36                     |
| SEA-2  | 196.37                | 209.47                | 231.21                | 212.35         | 17.59                  | 2.89                    | 2.68                    | 3.58                    | 3.05             | 0.47                     |
| SEA-3  | 129.22                | 136.76                | 143.22                | 136.40         | 7.01                   | 20.88                   | 21.64                   | 22.99                   | 21.84            | 1.07                     |
| SEA-4  | 196.56                | 194.45                | 203.94                | 198.32         | 4.98                   | 5.26                    | 5.55                    | 5.53                    | 5.45             | 0.16                     |

**Table S2.** Collected tensile test results for plotting Fig. 3D and the references.

| Reference number in Fig. 3D | Strain at break (%) | Stress at break (MPa) | References                                                                      |
|-----------------------------|---------------------|-----------------------|---------------------------------------------------------------------------------|
| S1                          | 1.63                | 19.5                  | ACS Macro Lett., 2016, 5, 1152–1156.<br>(DOI: 10.1021/acsmacrolett.6b00602)     |
|                             | 2.33                | 9.43                  |                                                                                 |
|                             | 228.33              | 2.33                  |                                                                                 |
|                             | 1.27                | 10.1                  |                                                                                 |
| S2                          | 280                 | 1.38                  | ACS Appl. Polym. Mater., 2020, 2, 5173–5178.<br>(DOI:10.1021/acsapm.0c00924)    |
|                             | 320                 | 0.44                  |                                                                                 |
|                             | 430                 | 0.13                  |                                                                                 |
| S3                          | 2.8                 | 17.5                  | ACS Macro Lett., 2015, 4, 862–866.<br>(DOI: 10.1021/acsmacrolett.5b00502)       |
|                             | 7.9                 | 6.9                   |                                                                                 |
|                             | 9.8                 | 12.9                  |                                                                                 |
| S4                          | 7.19                | 0.25                  | Adv. Funct. Mater., 2019, 1808989.<br>(DOI: 10.1002/adfm.201808989)             |
|                             | 8.28                | 0.59                  |                                                                                 |
|                             | 9.94                | 0.74                  |                                                                                 |
|                             | 9.11                | 0.85                  |                                                                                 |
|                             | 9.94                | 1.01                  |                                                                                 |
| S5                          | 19                  | 2.1                   | J. Mater. Chem. A, 2019, 7, 15683-15690.<br>(DOI: 10.1039/c9ta03222c)           |
|                             | 20                  | 1.68                  |                                                                                 |
|                             | 17                  | 1.43                  |                                                                                 |
| S6                          | 32                  | 22                    | Macromol. Rapid Commun., 2017, 38, 1700051.<br>(DOI:10.1002/marc.201700051)     |
| S7                          | 45                  | 0.93                  | Chem. Eur. J., 2019, 25, 10433-10440.<br>(DOI:10.1002/chem.201901619)           |
|                             | 27                  | 0.97                  |                                                                                 |
| S8                          | 35.28               | 0.14                  | Angew. Chem. Int. Edit., 2020, 59, 13371-13378.<br>(DOI:10.1002/anie.202004311) |
|                             | 51.2                | 0.59                  |                                                                                 |
|                             | 42.06               | 1.88                  |                                                                                 |
|                             | 15.08               | 9.64                  |                                                                                 |
|                             | 11.85               | 20.17                 |                                                                                 |
| S9                          | 0.88                | 5                     |                                                                                 |

|     |        |       |                                                                              |
|-----|--------|-------|------------------------------------------------------------------------------|
|     | 1.14   | 3.9   | ACS Appl. Polym. Mater., 2020, 2, 3761–3765.<br>(DOI:10.1021/acsapm.0c00803) |
|     | 0.76   | 4.08  |                                                                              |
| S10 | 22     | 1.92  | J. Polym. Sci., 2020, 58, 438–445.<br>(DOI: 10.1002/pol.20190138)            |
|     | 18     | 1.6   |                                                                              |
| S11 | 21.5   | 2.6   | Sustain. Chem. Pharm., 2020, 16, 100249.<br>(DOI:10.1016/j.scp.2020.100249)  |
|     | 25.7   | 1.5   |                                                                              |
| S12 | 1.7    | 7     | RSC Adv., 2019, 9, 31460–31465<br>(DOI: 10.1039/c9ra06213k)                  |
| S13 | 47.67  | 1.3   | Mater Lett., 2017, 203, 58-61.<br>(DOI:10.1016/j.matlet.2017.05.133)         |
|     | 71.46  | 2     |                                                                              |
|     | 53.62  | 6.1   |                                                                              |
| S14 | 72     | 3.85  | Polymers, 2017, 9, 59.<br>(DOI:10.3390/polym9020059)                         |
|     | 50     | 2.1   |                                                                              |
| S15 | 32     | 2.9   | J Polym Sci., 2020, 58, 2943–2950.<br>(DOI: 10.1002/pol.20200521)            |
|     | 98     | 1.21  |                                                                              |
|     | 32     | 3.7   |                                                                              |
| S16 | 167.3  | 6.36  | Chem. Mater. 2022, 34, 1167–1178.<br>(DOI:10.1021/acs.chemmater.1c03662)     |
|     | 113.28 | 13.21 |                                                                              |
| S17 | 3.44   | 60.44 | Chem. Sci., 2022, 13, 566–572.<br>(DOI: 10.1039/d1sc05896g)                  |
|     | 17     | 13.55 |                                                                              |

**Table S3.** Component ratios of control studies for SEA-1.

| Sample | Sulfur<br>[g] | 10-undecenoic<br>acid [g] | DGEBA<br>[g] | Oleic<br>acid [g] | 1-Dodecene<br>[g] | Zinc diethyl-<br>dithiocarbamate [mg] |
|--------|---------------|---------------------------|--------------|-------------------|-------------------|---------------------------------------|
| SEA-1  | 1.0           | 2.0                       | 3.0          | 0                 | 0                 | 0                                     |
| C-1    | 1.0           | 0                         | 3.0          | 2.0               | 0                 | 0                                     |
| C-2    | 1.0           | 2.0                       | 3.0          | 0                 | 0                 | 60.0                                  |
| C-3    | 1.0           | 0                         | 3.0          | 0                 | 0                 | 0                                     |
| C-4    | 1.0           | 0                         | 3.0          | 0                 | 2                 | 0                                     |

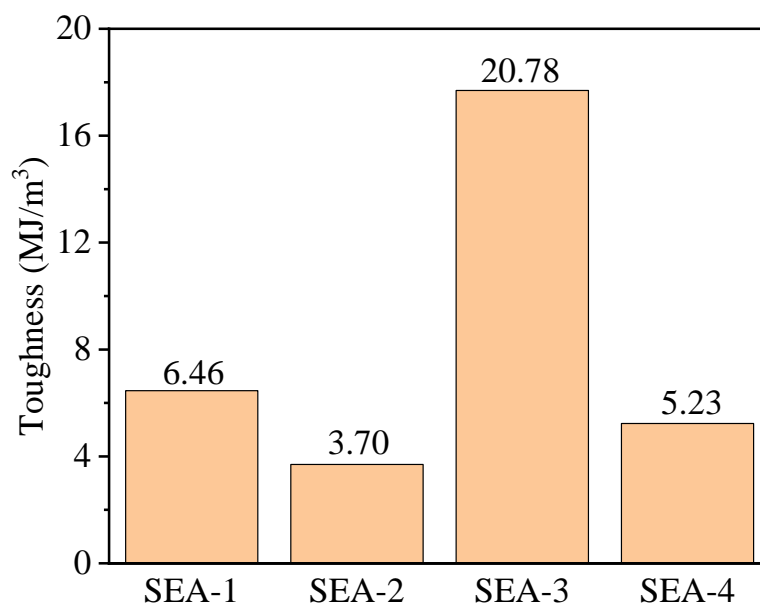

**Fig. S5.** Toughness calculation for SEA curves given in Fig. 3A.

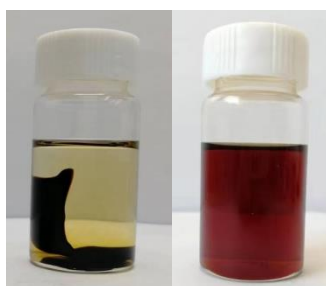

**Fig. S6.** Solubility test of C-1 in DMF, 1 minute after putting the film in DMF (left) and 12 hours later (right).

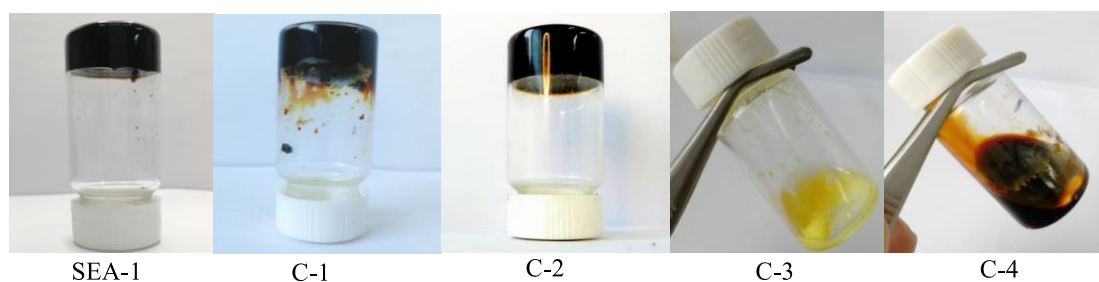

**Fig. S7.** Photo of SEA-1 and other samples from the control studies.

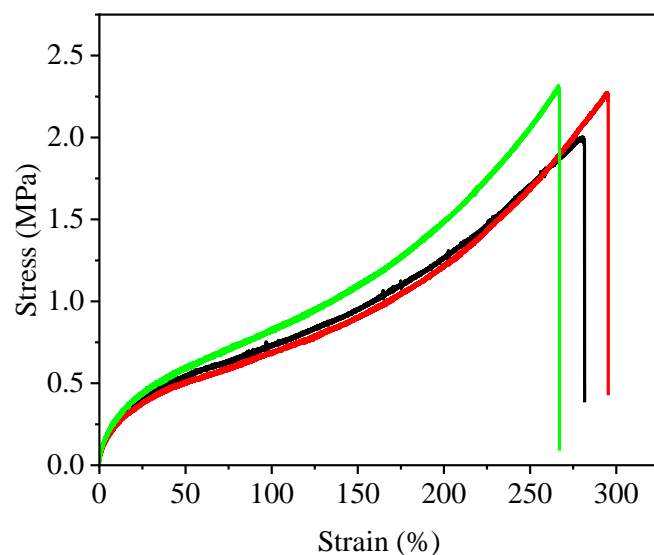

**Fig. S8.** Tensile testing results of control sample C-2.

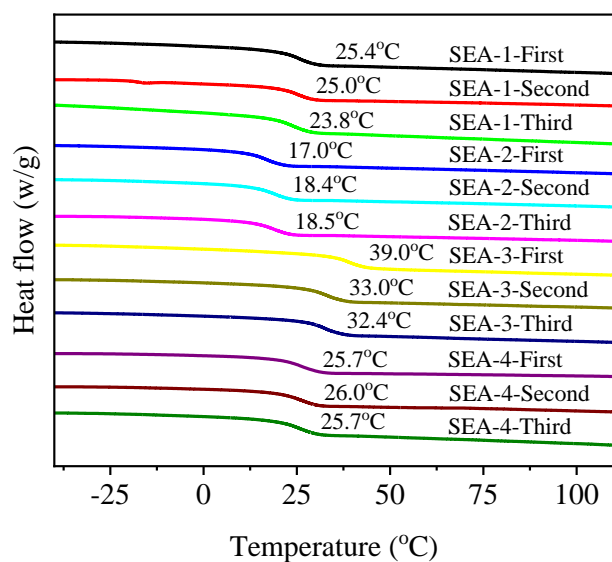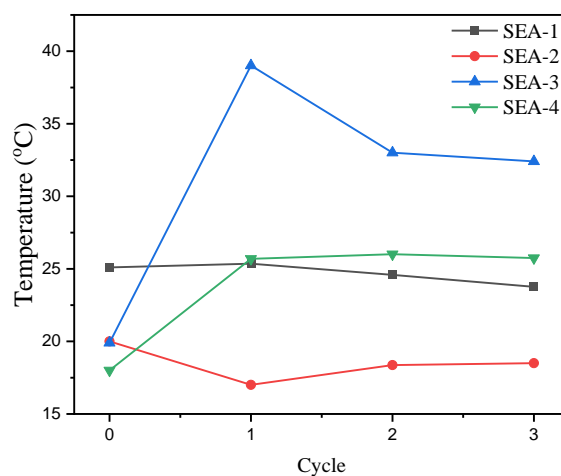

**Fig. S9.** DSC thermograms of SEA samples after different cycles of hot-pressing (TOP) and summarized T<sub>g</sub> in comparison with the as-prepared sample (bottom).

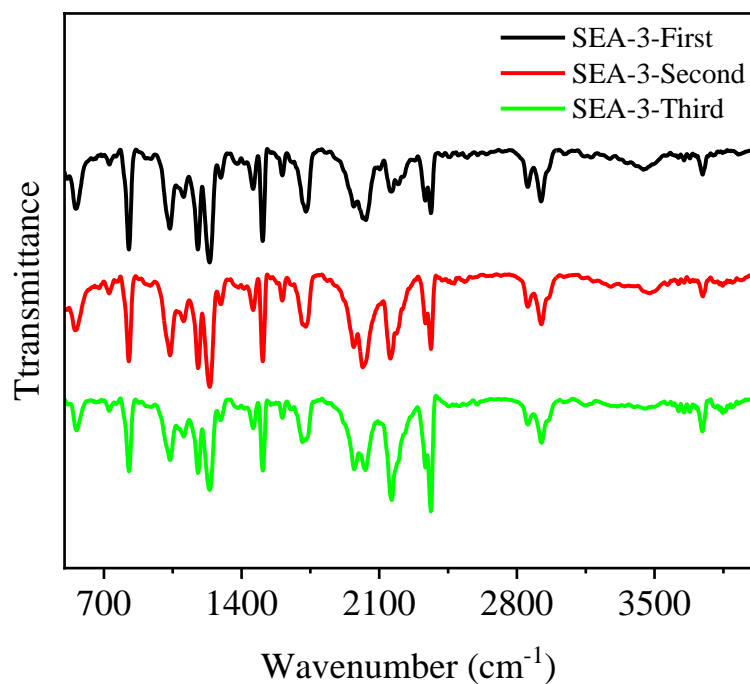

**Fig. S10.** FT-IR spectrum of SEA-3 samples after each hot-pressing cycle.

**Table S4.** Summary of lap shear strength (LSS) testing results for SEA samples and SK-13.

| Sample    | LSS [MPa] | LSS [MPa] | LSS [MPa] | Mean value<br>[MPa] | Standard<br>deviation<br>[MPa] |
|-----------|-----------|-----------|-----------|---------------------|--------------------------------|
|           | A         | B         | C         |                     |                                |
| SEA-1-Wet | 33.31     | 28.14     | 32.58     | 31.34               | 2.79                           |
| SEA-2-Wet | 25.99     | 24.12     | 24.40     | 24.84               | 1.01                           |
| SEA-3-Wet | 24.19     | 26.22     | 25.26     | 25.23               | 1.01                           |
| SEA-4-Wet | 32.21     | 31.46     | 29.97     | 31.22               | 1.14                           |
| SEA-1-Dry | 12.26     | 13.43     | 12.62     | 12.77               | 0.61                           |
| SEA-2-Dry | 4.07      | 4.41      | 4.05      | 4.18                | 0.20                           |
| SEA-3-Dry | 19.74     | 23.01     | 22.01     | 21.58               | 1.67                           |
| SEA-4-Dry | 11.94     | 11.67     | 9.93      | 11.18               | 1.09                           |
| SK-13     | 18.43     | 19.38     | 19.08     | 18.96               | 0.48                           |



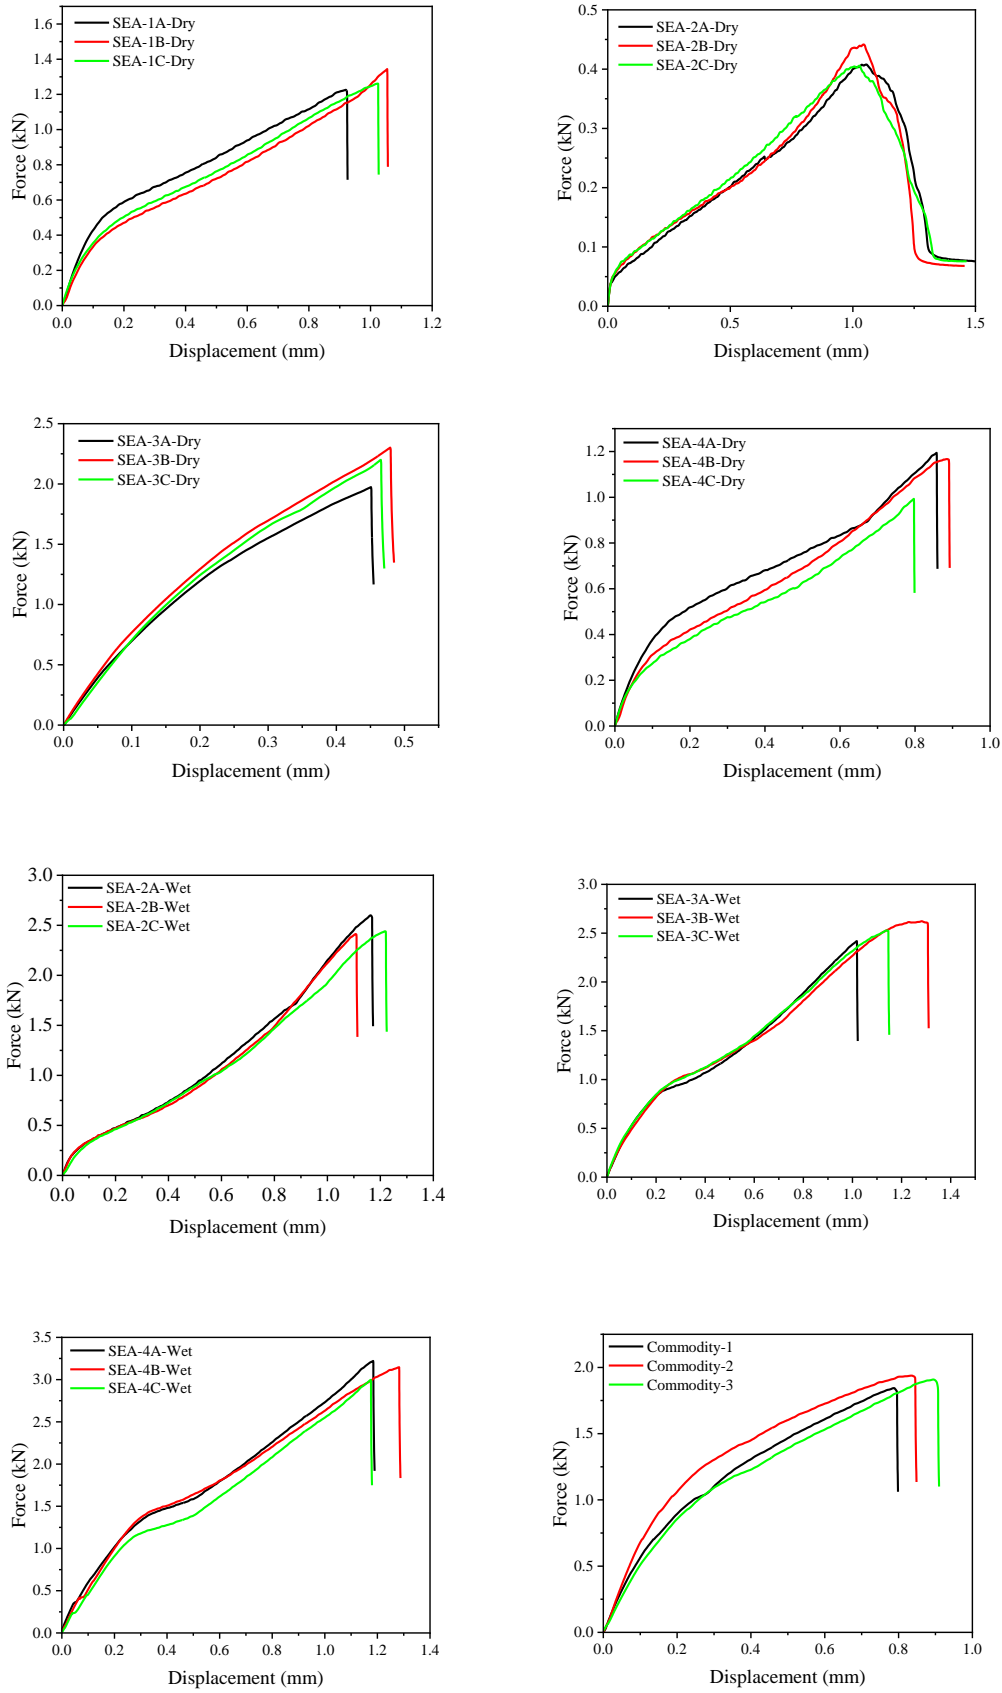

**Fig. S11.** Load displacement curves of SEA samples and commodity epoxy adhesive SK-13 during the lap shear strength testing. For all testing specimens, the overlapping area is 10 mm × 10 mm.

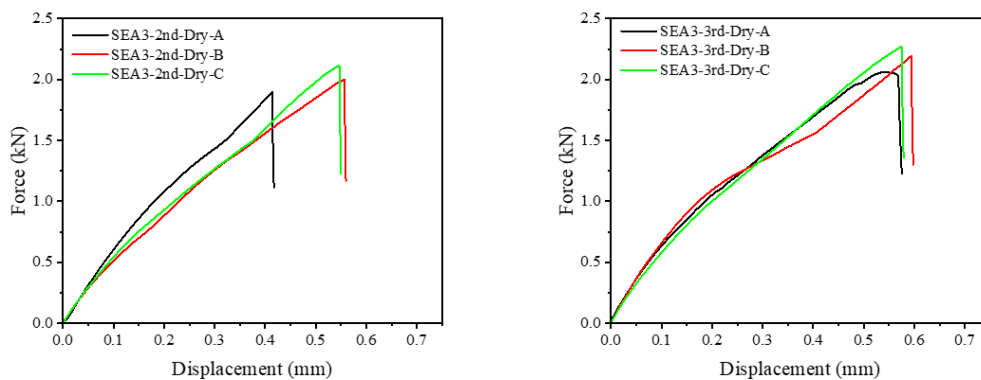

**Fig. S12.** Dry adhesive bonding test for reprocessed SEA-3 films after the second (left) and third (right) cycle.

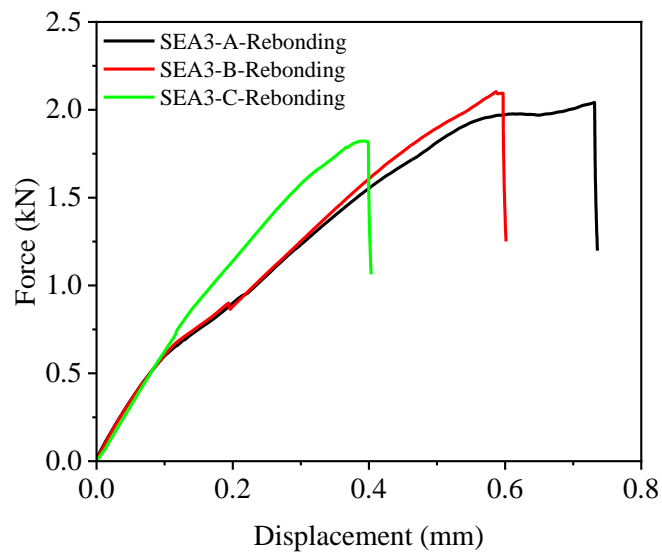

**Fig. S13.** SEA-3 dry adhesive re-bonding test.
